# AGK enhances angiogenesis and inhibits apoptosis via activation of the NF- $\kappa$ B signaling pathway in hepatocellular carcinoma

Yanmei Cui<sup>1,\*</sup>, Chuyong Lin<sup>1,\*</sup>, Zhiqiang Wu<sup>2,\*</sup>, Aibin Liu<sup>2</sup>, Xin Zhang<sup>1</sup>, Jinrong Zhu<sup>2</sup>, Geyan Wu<sup>2</sup>, Jueheng Wu<sup>3</sup>, Mengfeng Li<sup>3</sup>, Jun Li<sup>2</sup>, Libing Song<sup>1</sup>

<sup>1</sup>State Key Laboratory of Oncology in Southern China, Department of Experimental Research, Collaborative Innovation Center for Cancer Medicine, Sun Yat-sen University Cancer Center, Guangzhou 510060, China

<sup>2</sup>Department of Biochemistry, Zhongshan School of Medicine, Sun Yat-sen University, Guangzhou, Guangdong 510080, China

<sup>3</sup>Department of Microbiology, Zhongshan School of Medicine, Sun Yat-sen University, Guangzhou, Guangdong 510080, China

\*These authors contributed equally to this work

## Correspondence to:

Libing Song, e-mail: lb.song1@gmail.com

Jun Li, e-mail: lijun37@mail.sysu.edu.cn

**Keywords:** AGK, Hepatocellular carcinoma, Angiogenesis, Apoptosis, NF- $\kappa$ B signaling

**Received:** October 04, 2014

**Accepted:** October 28, 2014

**Published:** November 29, 2014

## ABSTRACT

**High levels of angiogenesis and resistance to apoptosis are major clinical features of hepatocellular carcinoma (HCC), a lethal disease with a high incidence worldwide. However, the precise mechanisms underlying these malignant properties remain unclear. Here, we demonstrated that acylglycerol kinase (AGK) is markedly overexpressed in HCC cell lines and clinical tissues. Immunohistochemical analysis of 245 clinical HCC specimens revealed patients with high levels of AGK expression had poorer overall survival compared to patients with low AGK expression. Furthermore, overexpressing AGK significantly enhanced angiogenesis and inhibited apoptosis *in vitro* and promoted the tumorigenicity of HCC cells *in vivo*; silencing endogenous AGK had the opposite effects. Importantly, AGK enhanced angiogenesis and inhibited apoptosis in HCC in part via activation of NF- $\kappa$ B signaling. Our findings provide new evidence that AGK plays an important role in promoting angiogenesis and providing resistance to apoptosis, thus AGK may represent a novel therapeutic target for HCC.**

## INTRODUCTION

Hepatocellular carcinoma (HCC) is one of the most common types of cancer and fourth leading cause of cancer-related deaths worldwide [1]. HCC is characterized by a progressive pattern of development and has an extremely poor prognosis; both of these characteristics have been attributed to the highly vascular nature of HCC [2, 3]. Vascular endothelial growth factor (VEGF) has been identified as a major proangiogenic factor and independent prognostic marker in HCC [4–6]. Additionally, HCC cells proliferate rapidly and are highly resistant to apoptosis, resulting in significant insensitivity to chemotherapy [7]. Therefore, investigation of the mechanisms that contribute to angiogenesis and resistance to apoptosis may help to further uncover the biological basis of HCC and improve clinical therapy [8–11].

The nuclear factor- $\kappa$ B (NF- $\kappa$ B) pathway plays important roles in the regulation of angiogenesis and cell survival and is constitutively activated in a variety of human cancers, including HCC [12–16]. Upon stimulation by extracellular signals, the inhibitors of NF- $\kappa$ B (I $\kappa$ Bs) could be phosphorylated by I $\kappa$ B kinase (IKK) and subsequently ubiquitinated, leading to proteasomal degradation of I $\kappa$ Bs and translocation of cytoplasmic NF- $\kappa$ B p50/p65 into the nucleus, thereby activating the transcription of various NF- $\kappa$ B target genes, including *Bcl-X<sub>L</sub>*, *XIAP*, *FLIP* and *VEGF*, which protect against apoptosis and promote angiogenesis [12, 17, 18]. Recently, mutations in components of the NF- $\kappa$ B signaling system have been identified in multiple hematopoietic malignancies and are thought to result in cell-autonomous activation of NF- $\kappa$ B; however, extensive research has failed to identify NF- $\kappa$ B-activating mutations in most

solid tumor types including HCC [17, 19–21]. Therefore, identification of the causes that lead to aberrant activation of the NF- $\kappa$ B pathway in HCC is urgently required.

Acylglycerol kinase (AGK) was originally identified as a multisubstrate lipid kinase, and catalyzes the phosphorylation of acylglycerols to generate lysophosphatidic acid (LPA), thus regulating multiple cellular processes related to pathogenesis of cancer [22]. AGK has been reported to be upregulated in various tumor types including prostate cancer, esophageal squamous cell carcinoma, ovarian cancer, gastric cancer and breast cancer [23–26]. Overexpression of AGK transactivates epidermal growth factor receptor (EGFR) and enhances the proliferation and migration of prostate cancer cells *in vitro* [23, 24, 27]. However, the clinical implications and function of AGK in HCC are not well defined.

In the present study, we report that AGK is significantly upregulated in HCC and correlated with poorer overall survival in patients with HCC. Moreover, AGK enhanced angiogenesis and inhibited apoptosis in HCC cells both *in vitro* and *in vivo*, at least in part via activation of the NF- $\kappa$ B signaling pathway. This study reveals a novel mechanism that may contribute to the poor prognosis of HCC and may also provide a novel therapeutic target.

## RESULTS

### AGK is upregulated and is associated with a poor prognosis in HCC

To investigate the role of AGK in the progression of HCC, we first examined the expression pattern of AGK in HCC cell lines and human HCC tissues. Real-time PCR and western blotting analyses showed that AGK mRNA and protein expression were significantly upregulated in all eleven HCC cell lines tested compared to two immortalized normal liver cell lines (Figure 1A and Supplementary Figure 1A). Moreover, AGK expression was markedly upregulated in eight HCC tissues compared to the paired adjacent noncancerous tissues (Figure 1B and Supplementary Figure 1B). Collectively, these data demonstrate that AGK is upregulated in HCC.

To investigate the clinical significance of upregulation of AGK in HCC, AGK protein expression was examined in 245 paraffin-embedded, archived HCC tissues using immunohistochemistry (IHC). As shown in Figure 1C and Supplementary Table 1, expression of AGK correlated significantly with clinical stage ( $P < 0.001$ ) and T classification ( $P = 0.001$ ) in HCC. Notably, Kaplan-Meier survival analysis revealed that patients with high AGK expression had poorer overall survival than patients with low AGK expression (Figure 1D,  $P < 0.001$ ), indicating that AGK may have potential as an independent prognostic marker in HCC. To further confirm

the clinicopathological relevance of AGK in HCC, we analyzed *AGK* mRNA expression in published expression profiles from GEO dataset (GSE25097). Interestingly, the expression of *AGK* sequentially increased in healthy liver, cirrhosis tissues and HCC (Figure 1E), suggesting that AGK may play a crucial role in the pathogenesis of HCC.

### AGK promotes an aggressive phenotype in HCC cells *in vitro*

To investigate the biological function of AGK during the pathogenesis of HCC, we established stable AGK-expressing HCC cells using the cell lines Huh-7 and PLC (Figure 2A). Strikingly, overexpression of AGK strongly enhanced the ability of HCC cells to induce tubule formation and migration by human umbilical vein endothelial cells (HUVECs) (Figure 2B and C). Moreover, overexpression of AGK conferred resistance to cisplatin-induced apoptosis in HCC cells (Figure 2D and E).

Conversely, silencing of AGK significantly reduced the ability of HCC cells to induce tubule formation and migration by HUVECs, and increased the sensitivity of HCC cells to cisplatin-induced apoptosis *in vitro* (Figure 3A-E and Supplementary Figure 2A). Taken together, these results suggest that AGK plays an important role in promoting the aggressive behavior of HCC cells.

### AGK contributes to the progression of HCC *in vivo*

Next, we investigated the effect of AGK on the tumorigenicity of HCC cells using an *in vivo* mouse model. As shown in Figure 4A-C and Supplementary Figure 2B, the tumors formed by AGK-transduced HCC cells grew more rapidly and were larger in size, while the tumors formed by AGK-silenced cells were smaller in both size and weight, compared to the tumors formed by control cells. Moreover, the tumors established using AGK-transduced HCC cells were resistant to apoptosis and formed larger tumors than control cells in mice treated with cisplatin (Figure 4D-E), and had fewer TUNEL-positive apoptotic cells compared to control tumors (Figure 4F). Collectively, these results indicate that AGK contributes to the progression of HCC *in vivo*.

### AGK regulates the NF- $\kappa$ B signaling pathway in HCC

As a growing body of evidence demonstrates that the NF- $\kappa$ B signaling pathway plays a central role in both angiogenesis and resistance to apoptosis in HCC [28–30], we investigated whether AGK is involved in regulation of the NF- $\kappa$ B signaling pathway in HCC. As shown in Figure 5A-D, overexpression of AGK significantly increased and silencing of AGK reduced the luciferase reporter gene activity, NF- $\kappa$ B DNA-binding ability and mRNA

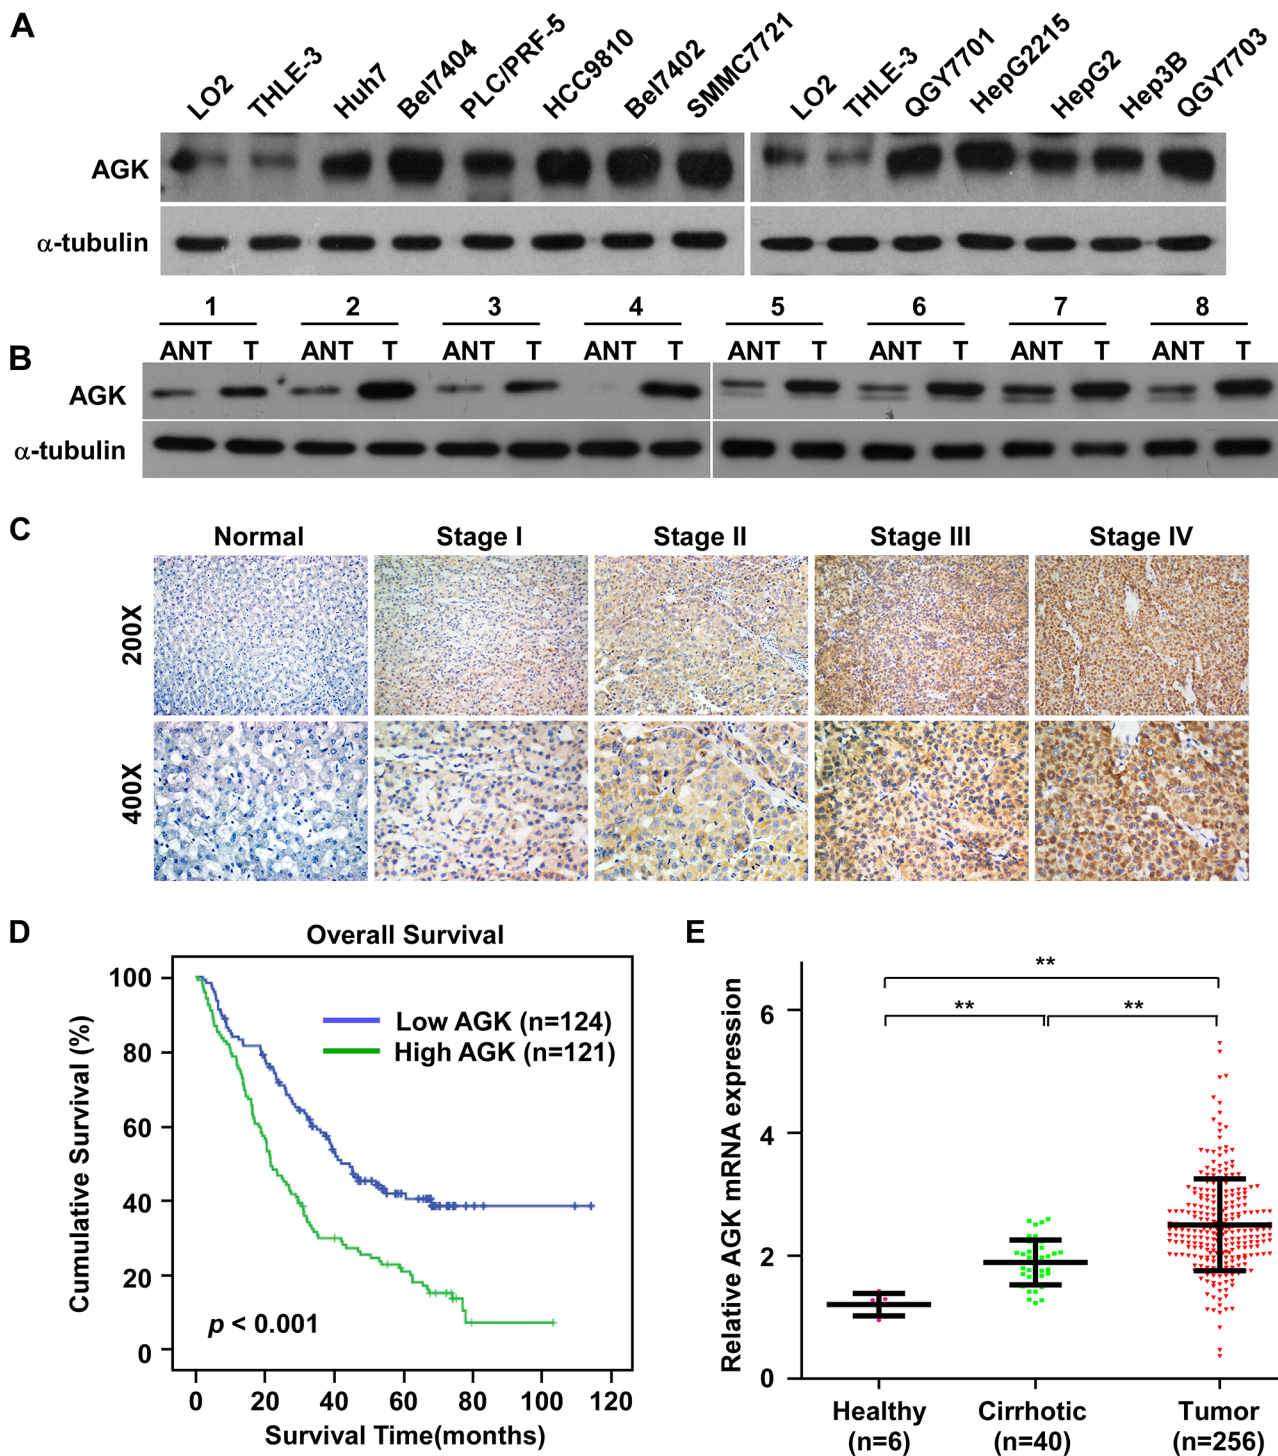

**Figure 1: AGK is upregulated in HCC cell lines and primary human HCC tissues. (A and B).** Western blotting analysis of AGK expression in two immortalized normal liver cell lines and 11 HCC cell lines (A) and in eight paired primary HCC tissues (T) and the adjacent noncancerous tissues (ANT) from the same patients (B);  $\alpha$ -tubulin was used as a loading control. (C) IHC staining of AGK expression in human HCC (clinical stages I–IV) and normal liver tissues. (D) Kaplan-Meier overall survival curves for patients with HCC stratified by low ( $n = 124$ ) and high ( $n = 121$ ) expression of AGK ( $P < 0.001$ ). (E) GEO data (GSE25097) analysis of AGK mRNA expression in normal liver tissues from healthy individuals ( $n = 6$ ), cirrhotic tissues ( $n = 40$ ) and HCC tissues ( $n = 256$ );  $**P < 0.001$ .

expression levels of numerous well-characterized NF- $\kappa$ B downstream genes, suggesting that AGK may contribute to activation of NF- $\kappa$ B. Moreover, western blotting demonstrated that the phosphorylation of IKK- $\beta$  and I $\kappa$ B $\alpha$

and the expression of c-FLIP, XIAP, Bcl-x1 and Bcl-2, all of which are all well-characterized NF- $\kappa$ B downstream genes, were upregulated in AGK-overexpressing cells and downregulated in AGK-silenced cells (Figure 5E).



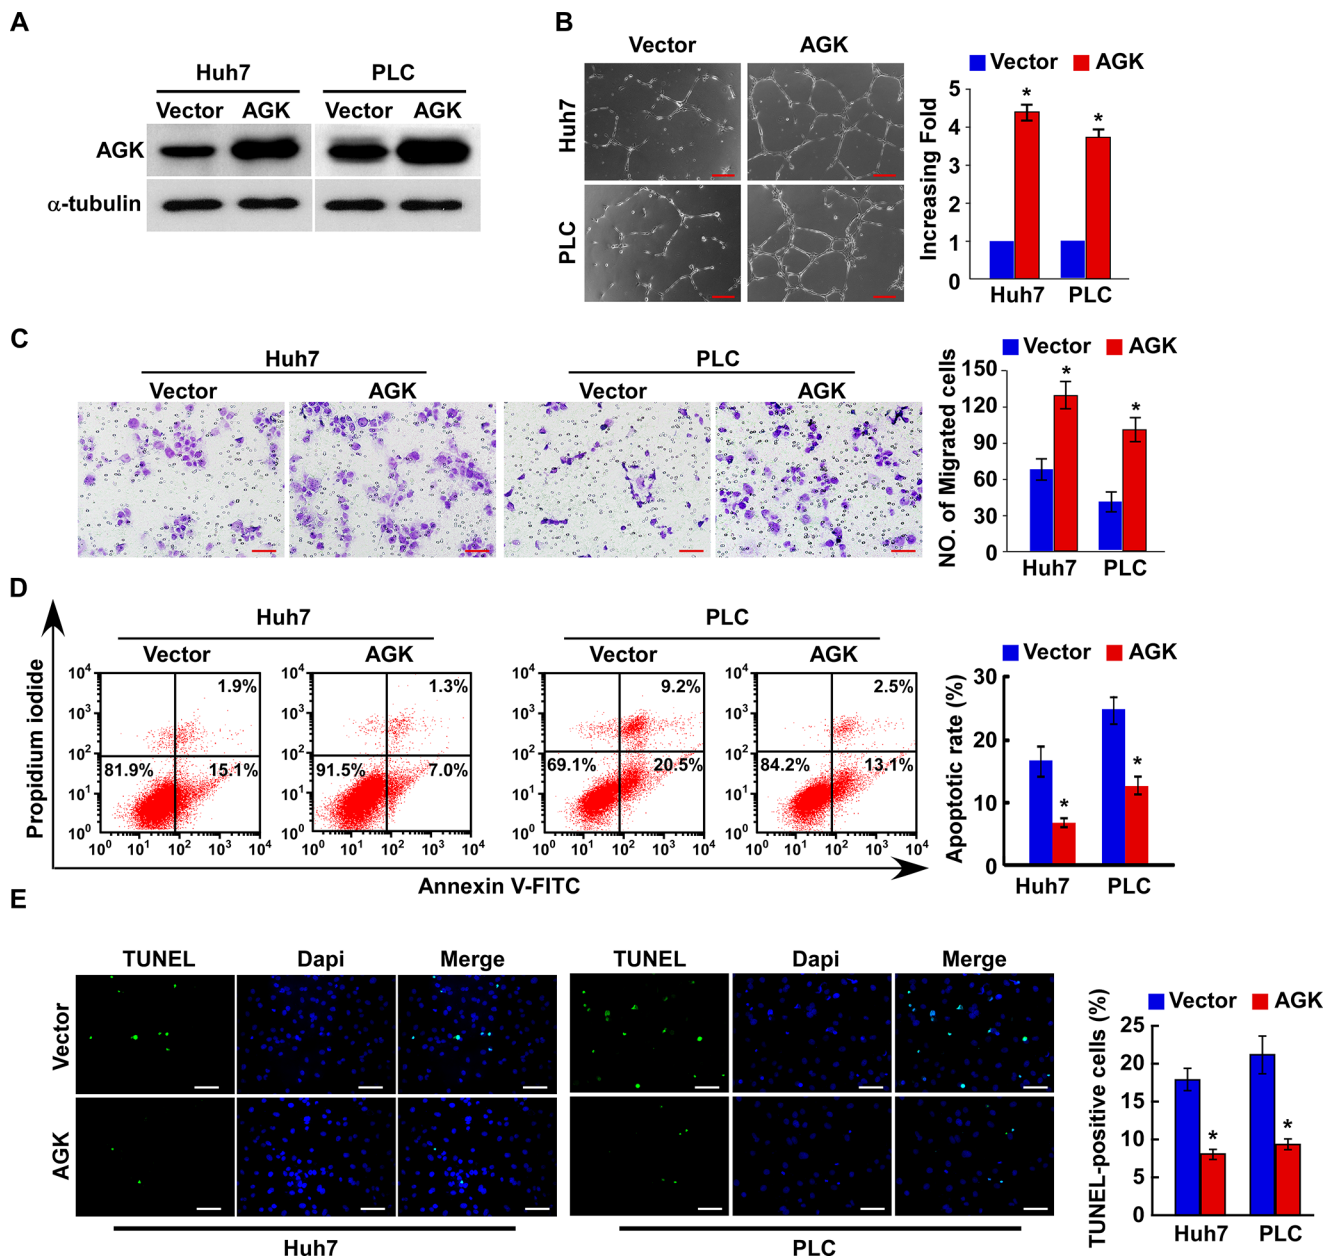

**Figure 2: Overexpression of AGK promotes angiogenesis and inhibits apoptosis in HCC cells *in vitro*.** (A) Overexpression of AGK in Huh7 and PLC cell lines was confirmed by western blotting;  $\alpha$ -tubulin was used as a loading control. (B) Representative images (left) and quantification (right) of tubule formation by HUVECs cultured on Matrigel-coated plates with conditioned medium collected from the indicated HCC cells. Scale bars: 200  $\mu$ m. Each bar represents the mean  $\pm$  SD of three independent experiments;  $*P < 0.05$ . (C) Cell migration was assessed by culturing HUVECs with conditioned media collected from the indicated HCC cells. Scale bars: 50  $\mu$ m. Each bar represents the mean  $\pm$  SD of three independent experiments;  $*P < 0.05$ . (D) Annexin V-FITC/PI staining of the indicated cells after treatment with cisplatin (20  $\mu$ M) for 24 hours. Each bar represents the mean  $\pm$  SD of three independent experiments;  $*P < 0.05$ . (E) Representative images (left) and quantification of TUNEL-positive cells in the indicated cells after treatment with cisplatin (20  $\mu$ M) for 24 hours. Scale bars: 50  $\mu$ m. Each bar represents the mean  $\pm$  SD of three independent experiments;  $*P < 0.05$ .

Additionally, the expression of  $\text{I}\kappa\text{B}\alpha$  was reduced in AGK-transduced cells and increased in AGK-silenced cells (Figure 5E). Furthermore, overexpression of AGK significantly elevated while knockdown of AGK reduced the expression of VEGF-C in HCC cells (Figure 5F).

Next, we investigated whether activation of NF- $\kappa$ B signaling was required for AGK-induced angiogenesis

and resistance to apoptosis in HCC cells. As shown in Figure 5G and H, transfection of an  $\text{I}\kappa\text{B}\alpha$  dominant-negative mutant ( $\text{I}\kappa\text{B}\alpha$ -mut) or treatment with a NF- $\kappa$ B inhibitor abrogated the ability of AGK-overexpressing cells to promote tubule formation by HUVECs and reduced the ability of HCC cells to resist apoptosis induced by cisplatin. Taken together, these results



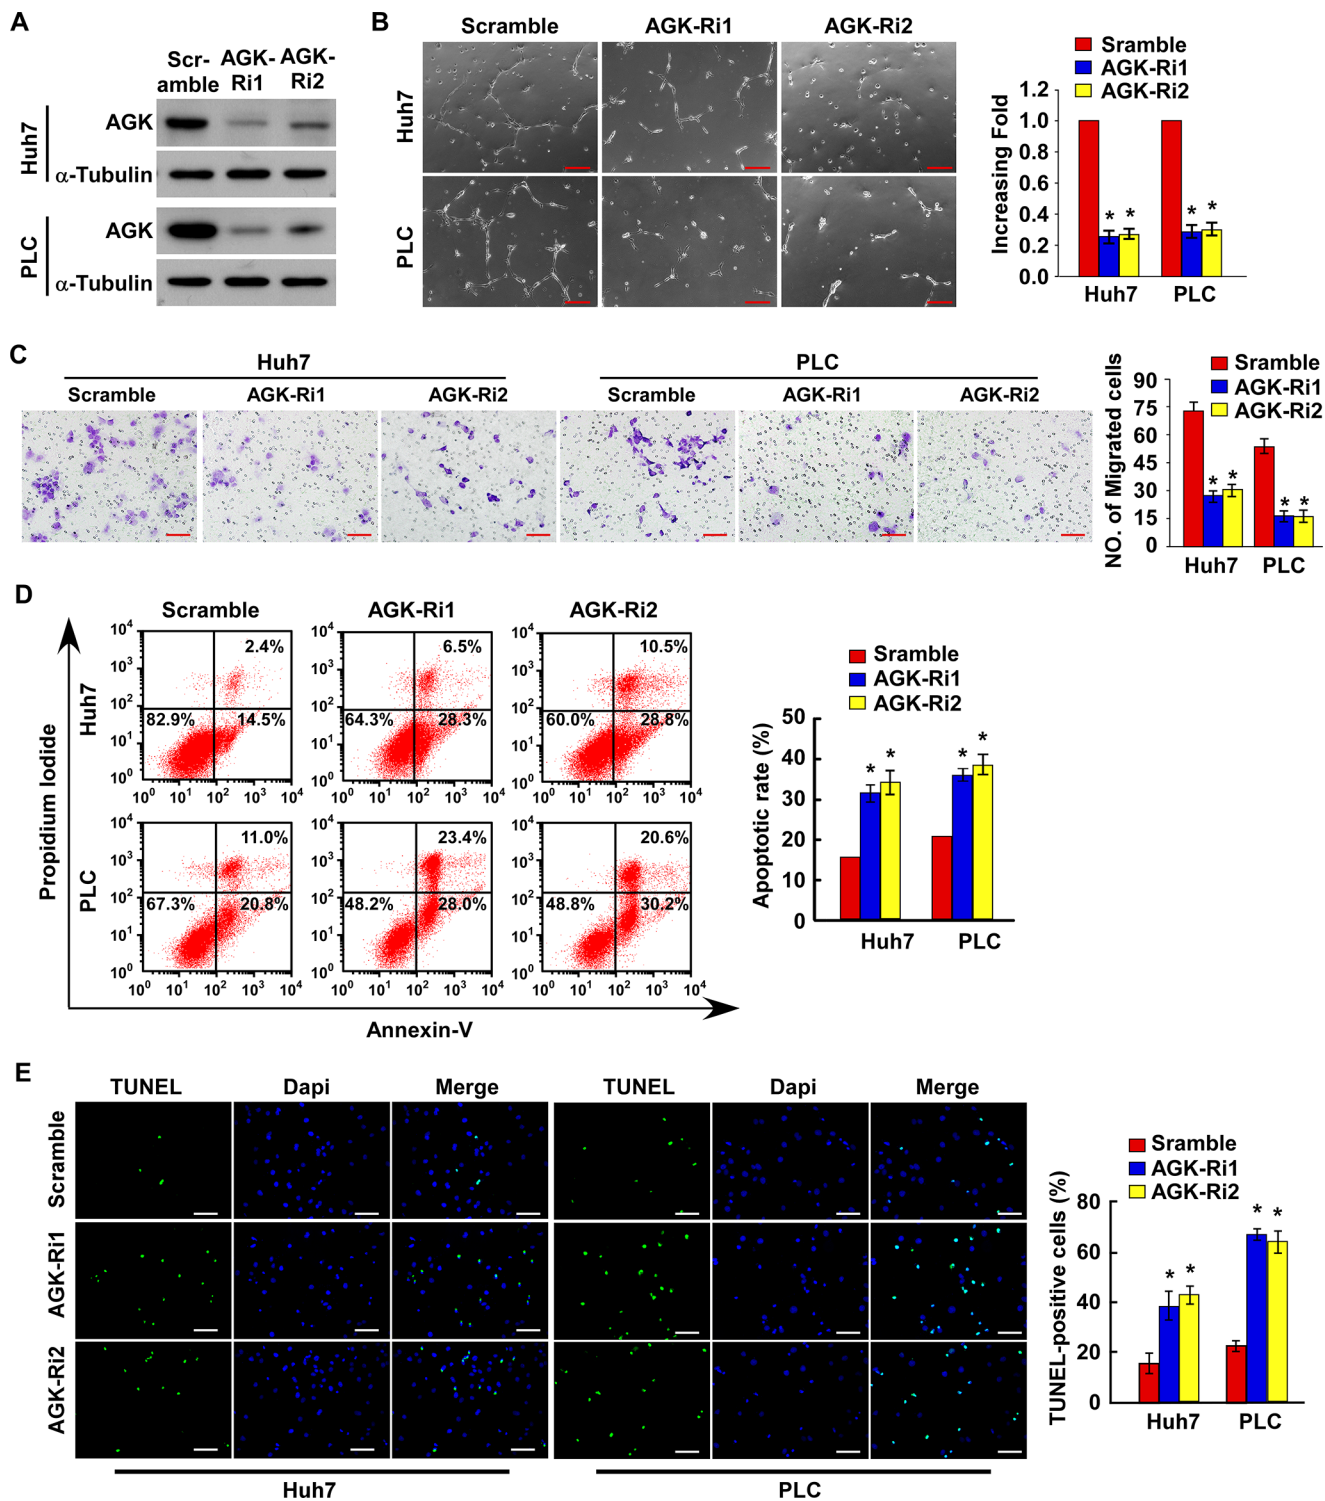

**Figure 3: Silencing of AGK inhibits angiogenesis and induces apoptosis in HCC cells *in vitro*.** (A) Confirmation of the silencing of *AGK* by two specific short hairpin RNAs in Huh-7 and PLC HCC cells;  $\alpha$ -tubulin was used as a loading control. (B) Representative images (left) and quantification (right) of tubule formation by HUVECs cultured in Matrigel-coated plates with conditioned medium collected from the indicated HCC cells. Scale bars: 200  $\mu$ m. Each bar represents the mean  $\pm$  SD of three independent experiments;  $*P < 0.05$ . (C) Cell migration was assessed by culturing HUVECs with conditioned media collected from the indicated HCC cells. Scale bars: 50  $\mu$ m. Each bar represents the mean  $\pm$  SD of three independent experiments;  $*P < 0.05$ . (D) Annexin V-FITC/PI staining of the indicated cells after treatment with cisplatin (20  $\mu$ M) for 24 hours. Each bar represents the mean  $\pm$  SD of three independent experiments;  $*P < 0.05$ . (E) Representative images (left) and quantification of TUNEL-positive cells in the indicated cells after treatment with cisplatin (20  $\mu$ M) for 24 hours. Scale bars: 50  $\mu$ m. Each bar represents the mean  $\pm$  SD of three independent experiments;  $*P < 0.05$ .

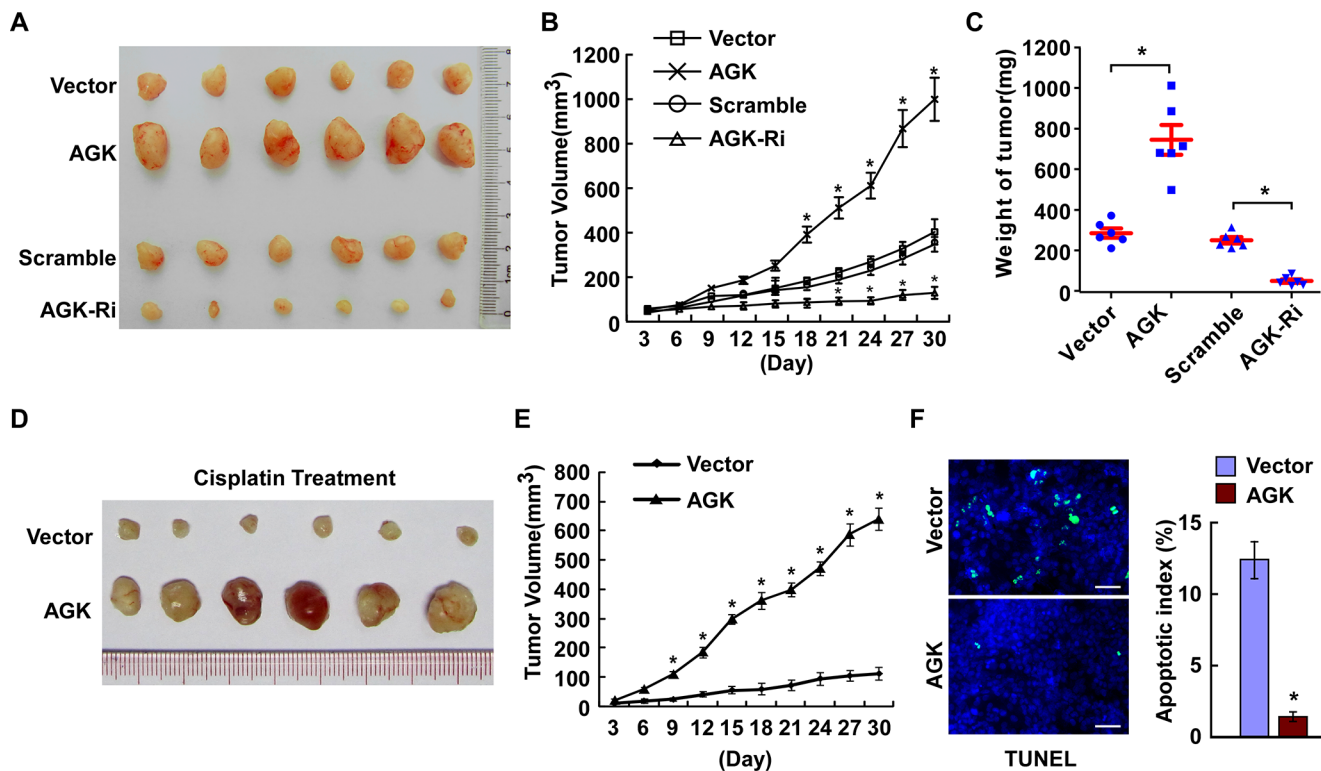

**Figure 4: AGK contributes to the progression of HCC *in vivo*.** (A) Representative images of tumors from all of the mice in each group. (B) Tumor volumes were measured on the indicated days. (C) Mean tumor weights for each group. (D-F) Xenograft tumors from the mice treated with cisplatin. (D) Images of the tumors from all mice in each group. (E) Tumor volumes were measured on the indicated days. (F) Apoptotic index, determined by the percentage of TUNEL-positive cells. Scale bars: 50  $\mu$ m. Each bar represents the mean  $\pm$  SD of three independent experiments; \* $P < 0.05$ .

indicate that the biological effects of AGK during the progression of HCC are mainly exerted via functional activation of the NF- $\kappa$ B signaling pathway.

### Clinical relevance of AGK-induced NF- $\kappa$ B activation in human HCC

We further investigated whether AGK expression and NF- $\kappa$ B activation are clinically relevant in human HCC. As shown in Figure 6, the level of AGK expression in ten freshly collected clinical HCC samples correlated positively with nuclear p65 expression ( $r = 0.721$ ,  $P = 0.019$ ) and the mRNA expression levels of the NF- $\kappa$ B downstream genes BCL2-like 1 (*BCL2L1*;  $r = 0.927$ ,  $P < 0.001$ ), X-linked IAP (*XIAP*;  $r = 0.867$ ,  $P = 0.001$ ) and *VEGF-C* ( $r = 0.758$ ,  $P = 0.011$ ). These data further support the notion that AGK can activate the NF- $\kappa$ B signaling pathway, and in turn may promote angiogenesis and lead to a poor clinical outcome in HCC.

## DISCUSSION

HCC is a hypervascular tumor type with high levels of neovascularization, and angiogenesis plays an essential role in the growth and progression of HCC [31–33].

Extensive evidence indicates that VEGF plays a crucial role in promoting angiogenesis in HCC [34, 35]. Tumor expression of VEGF has been significantly associated with tumor progression and poorer prognosis in patients with HCC [36–38]. Moreover, a high pretreatment serum VEGF level was predictive of poorer response and survival in patients with HCC undergoing chemoembolization [39, 40]. Despite this strong clinical relevance, the precise mechanisms that regulate angiogenesis and VEGF expression in HCC remain poorly clarified. In this study, we demonstrated that overexpression of AGK enhanced, whereas silencing of AGK suppressed, VEGF expression and angiogenesis in HCC cells *in vitro*. More importantly, overexpression of AGK promoted, while silencing of AGK inhibited, the growth and tumorigenicity of HCC cells in an *in vivo* mouse model. Clinical analysis also indicated that high expression of AGK was associated with poorer overall survival in patients with HCC. Therefore, these findings not only reveal a mechanism that promotes angiogenesis in HCC, but also provide insight into novel molecular targets for antiangiogenic therapy in HCC.

One distinguishing feature of HCC compared to other human cancers is its significant association with cirrhosis in the majority of cases. Several lines of evidence have shown that VEGF is upregulated in cirrhotic tissues and

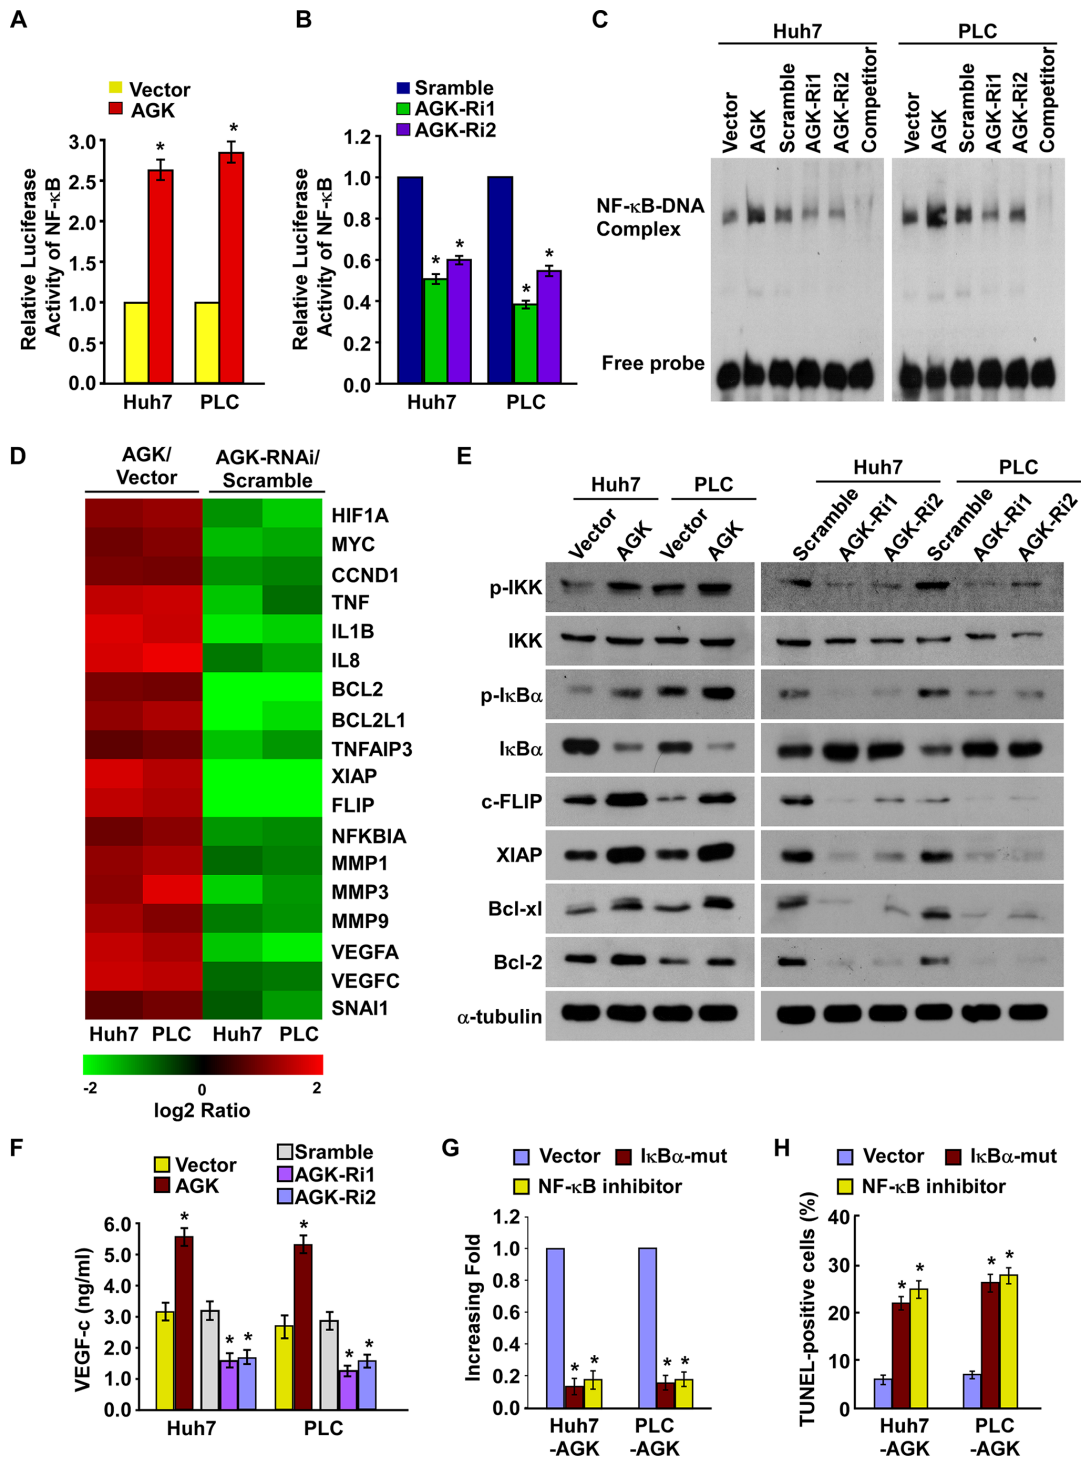

**Figure 5: AGK activates the NF- $\kappa$ B signaling pathway.** (A) Activity of the NF- $\kappa$ B luciferase reporter gene in HCC cells expressing either the empty vector or AGK. (B) Activity of the NF- $\kappa$ B luciferase reporter gene in HCC cells transfected with *AGK* siRNAs or control vector. Each bar represents the mean  $\pm$  SD of three independent experiments; \* $P$  < 0.05. (C) EMSA indicating that NF- $\kappa$ B activity increased in AGK-transduced cells and decreased in AGK-silenced cells. (D) Real-time PCR analysis demonstrating an apparent overlap between NF- $\kappa$ B-dependent gene expression and AGK-regulated gene expression. The pseudocolour represents the intensity scale for AGK versus the vector or AGK siRNA versus control siRNA, calculated by  $\log^2$  transformation. (E) Western blotting of the expression levels of the indicated proteins in the indicated cells. (F) ELISA showing the expression of VEGF-C in AGK-transduced or *AGK*-silenced HCC cells. Each bar represents the mean  $\pm$  SD of three independent experiments; \* $P$  < 0.05. (G) Quantification of tubule formation by HUVECs cultured in Matrigel-coated plates with conditioned media from HCC cells transfected with the vector, I $\kappa$ B $\alpha$ -mut or treated with the NF- $\kappa$ B inhibitor (JSH-23). (H) Quantification of cisplatin-induced (20  $\mu$ M) TUNEL-positive cells in HCC cells transfected with vector, I $\kappa$ B $\alpha$ -mut or treated with the NF- $\kappa$ B inhibitor. Each bar represents the mean  $\pm$  SD of three independent experiments; \* $P$  < 0.05.



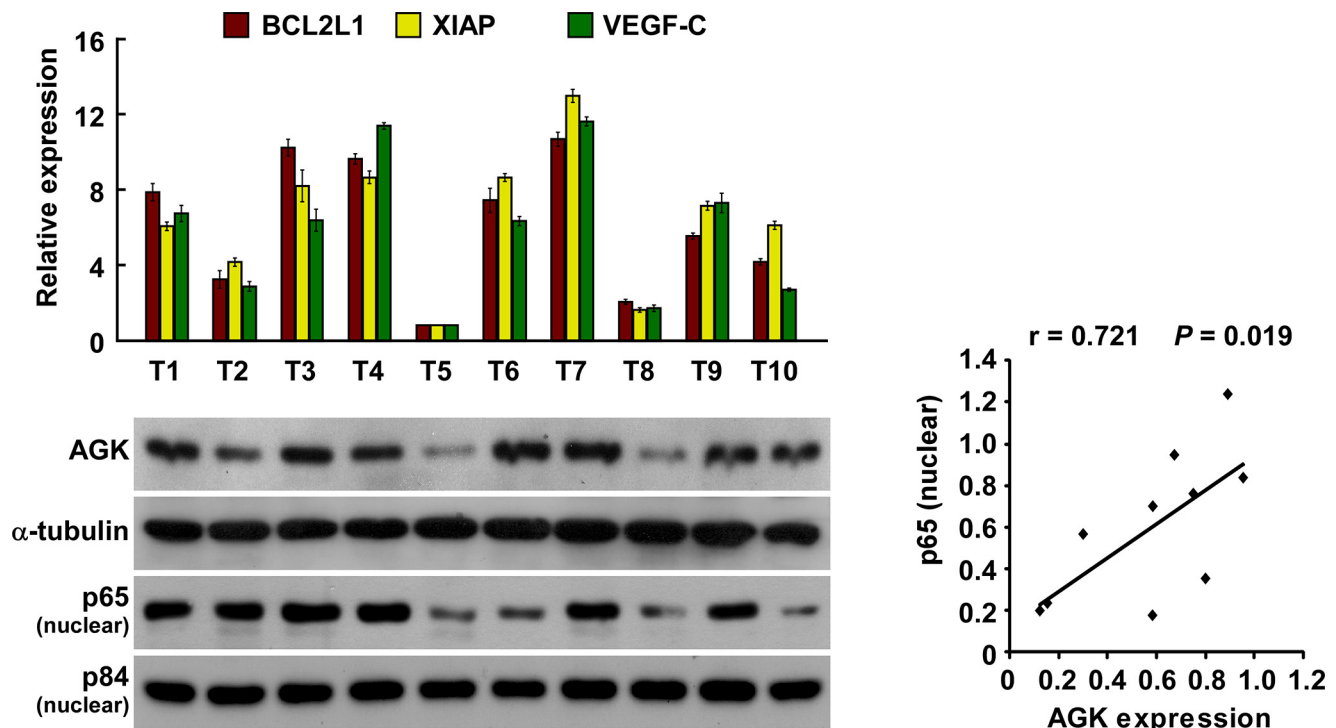

**Figure 6: Clinical relevance of AGK-induced NF-κB activation in HCC.** Expression analysis (left) and correlation (right) of AGK expression and BCL2L1, XIAP, VEGF-C and nuclear p65 expression in 10 freshly collected human HCC tissue samples (T); α-tubulin and nuclear protein p84 were used as loading controls. Each bar represents the mean ± SD of three independent experiments.

VEGF appears to play an important role in angiogenesis and the pathogenesis of cirrhosis, which may explain the pre-malignant potential of cirrhosis [41–43]. In agreement with these observations, analysis of previously published data revealed that *AGK* is significantly upregulated in cirrhotic tissues, which further supports our findings that *AGK* could upregulate expression of VEGF and promote angiogenesis. However, the biological role of *AGK* in cirrhosis and its relationship with hepatocarcinogenesis in cirrhotic tissues require further investigation.

Although surgical intervention is considered to be one of the most effective therapeutic strategies, the majority of patients with HCC who are diagnosed at a later stage are ineligible for surgical treatment and mainly receive systemic chemotherapy regimens [44–46]. Multiple chemotherapeutic agents including cisplatin are commonly used for the treatment of HCC; however, these approaches only provide very limited survival advantages due to the significant chemoresistance of HCC cells [47–49]. Thus, it is imperative to identify the key factors that regulate chemoresistance, as this may provide novel therapeutic targets for HCC. Herein, we found that overexpression of *AGK* enhanced the resistance of HCC cells to cisplatin-induced apoptosis, whereas silencing *AGK* increased the sensitivity of HCC cells to cisplatin-induced apoptosis; these effects were mediated via modulation of the expression of multiple anti-apoptotic factors including c-FLIP, XIAP, Bcl-xl

and Bcl-2. Moreover, an *in vivo* mouse model showed that *AGK*-transduced HCC cells formed larger tumors than control cells, even when the mice were treated with cisplatin, further confirming the anti-apoptotic effect of *AGK*. Consistent with our current findings, a previous study demonstrated that *AGK* was a significant factor that determined the patient response to chemoradiotherapy in esophageal squamous cell carcinoma [26]. Thus, we propose that *AGK* may have potential as target for therapy in a range of tumor types.

*AGK* has been reported to be upregulated in various types of tumors including prostate cancer, esophageal squamous cell carcinoma, ovarian cancer, gastric cancer and breast cancer [23, 25, 26]. Combined with the results of our study that *AGK* expression is elevated in HCC, we may infer that the upregulation of *AGK* could be a marker for cancerous state and may serve as a universal prognostic factor for cancer. Although evidence has established that NF-κB is constitutively activated in HCC [50], we did not observe significant alteration of *AGK* in the HCC cells transfected with IκBα-mut or treated with NF-κB inhibitor II. Interestingly, we found that *AGK* locus is located at the same region as *BRAF*, which is a putative proto-oncogene and has been reported to be frequently amplified in tumors [51, 52], suggesting that *AGK* overexpression in HCC might be attributed to genomic amplification. Thus, further investigation would be needed to reveal the causes for *AGK* upregulation in HCC.

Numerous studies have demonstrated that constitutive activation of NF- $\kappa$ B signaling plays an important role in the malignant transformation of hepatocytes and progression of HCC, which indicates that the NF- $\kappa$ B signaling pathway can be considered a potentially useful therapeutic target for HCC [50, 53–55]. However, considering the important role of NF- $\kappa$ B signaling in the normal immune response, direct targeting of the NF- $\kappa$ B pathway during the treatment of HCC is controversial [56]. In this study, ectopic overexpression of AGK significantly increased, whereas silencing AGK decreased, NF- $\kappa$ B activity in HCC cells. Additionally, disruption of NF- $\kappa$ B signaling by transfection of an I $\kappa$ B $\alpha$  dominant-negative mutant or treatment with a NF- $\kappa$ B inhibitor abrogated the ability of AGK-overexpressing cells to promote angiogenesis in HUVECs and reduced the resistance of HCC cells to apoptosis. As AGK is aberrantly expressed in HCC and contributes significantly to constitutive NF- $\kappa$ B signaling activation, targeting AGK may provide an effective strategy for inhibiting NF- $\kappa$ B signaling - and its subsequent effects on angiogenesis and resistance to apoptosis - during the treatment of HCC.

In summary, this study provides the first report of the expression of AGK in HCC cell lines and tissues, and demonstrates that upregulation of AGK may contribute to the progression and poor prognosis of human HCC. Additionally, this data suggests that *AGK* may function as an oncogene in HCC and may represent a promising prognostic biomarker for HCC. This study not only further elucidates the precise role of AGK in the pathogenesis of HCC, but also provides new insight into the biological basis of cancer progression and may help to identify more effective therapeutic strategies for HCC.

## MATERIALS AND METHODS

### Cell lines and cell culture

The hepatocellular carcinoma cell lines, including Huh7, Bel7404, PLC/PRF-5, HCC9810, Bel7402, SMMC7721, QGY7701, HepG2215, HepG2, Hep3B and QGY7703, were purchased from the American Type Culture Collection (ATCC, Manassas, VA, USA) and cultured in Dulbecco's modified Eagle's medium (Invitrogen, Carlsbad, CA, USA) supplemented with 10% fetal bovine serum (Invitrogen), 100U/ml penicillin and 100  $\mu$ g/ml streptomycin (Invitrogen). Normal liver epithelial cells LO2 were purchased from the Chinese Academy of Sciences Committee Type Culture Collection cell bank and were cultured under the conditions stated by the manufacturer. Normal liver epithelial cell THLE-3 were purchased from the American Type Culture Collection (ATCC, Manassas, VA) and cultured as suggested by the manufacturer.

### Patient information and tissue specimens

A total of 245 paraffin-embedded, archived clinical HCC specimens, histopathologically diagnosed at the Sun Yat-sen University Cancer Center from 2002 to 2005, were used in the current study. Prior patient consents and approvals from the Institutional Research Ethics Committee were obtained for the use of these clinical materials for research purposes. Clinical information of the samples is summarized in the Supplementary Table 1. The fresh HCC tissues and the matched adjacent noncancerous tissues (n = 8) and HCC tissues (without matched adjacent noncancerous tissues; n = 10) were frozen and stored in liquid nitrogen until further use.

### Plasmids and transfection

The plasmids for AGK ectopic overexpressing and silencing were constructed as previous study [25]. pNF- $\kappa$ B-luc and control plasmids (Clontech) were used to determine NF- $\kappa$ B activity. pBabe-Puro-I $\kappa$ B $\alpha$ -mut (plasmid 15291) expressing I $\kappa$ B $\alpha$  dominant-negative mutant (I $\kappa$ B $\alpha$ -mut) was purchased from Addgene (Cambridge, MA). Transfection was performed using the Lipofectamine 2000 reagent (Invitrogen, Carlsbad, CA) according to the manufacturer's instruction. Stable cell lines expressing AGK or AGK shRNAs were selected with 0.5  $\mu$ g/ml puromycin for 10 days.

### RNA extraction and real-time quantitative PCR

Total RNA from cultured cells was extracted using Trizol reagent (Invitrogen, Carlsbad, CA) according to the manufacturer's manual. cDNA was synthesized by M-MLV reverse transcriptase (Promega, Fitchburg, WI). Real-time PCR was performed in ABI Prism 7500 Sequence Detection System (Applied Biosystems, Foster City, CA) using dye SYBR Green I (Roche, Penzberg, Bavaria, Germany). Expression data were normalized to the geometric mean of housekeeping gene *GAPDH* to control the variability in expression levels and calculated as  $2^{-[(C_t \text{ of gene}) - (C_t \text{ of GAPDH})]}$ , where  $C_t$  represents the threshold cycle for each transcript.

### Immunohistochemistry (IHC)

IHC analysis was performed in 245 clinical HCC tissue sections as previously described [25]. The sections were reviewed and scored independently by two observers based on both the proportion of positively stained tumor cells and the intensity of staining. The proportion of positive tumor cells was scored as follows: 0, no positive tumor cells; 1, <10%; 2, 10%–35%; 3, 35%–75%; 4, >75%. The intensity of staining was graded according to the following criteria: 1, no staining; 2, weak staining (light yellow); 3, moderate staining (yellow–brown);

4, strong staining (brown). The staining index (SI) was calculated as staining intensity score  $\times$  proportion of positive tumor cells. Using this method of assessment, the expression of AGK was scored as 0, 2, 3, 4, 6, 8, 9, 12 and 16. Cut-off values were chosen on the basis of a measure of heterogeneity with the log-rank test statistical analysis with respect to overall survival. SI  $\geq$ 8 was defined as high AGK expression and SI  $<$ 8 was defined as low AGK expression.

### Western blotting analysis

Western blotting was performed as previously described [57], using anti-AGK antibody (Epitomics, Burlingame, CA), anti-IKK $\beta$ , anti-p-IKK $\beta$  (Santa Cruz Biotech., Santa Cruz, CA), anti-I $\kappa$ B $\alpha$ , anti-p-I $\kappa$ B $\alpha$ , anti-c-FLIP, anti-XIAP, anti-Bcl-xl, anti-Bcl-2, anti-p65, anti-p84 antibodies (Cell Signaling, Danvers, MA). The membranes were stripped and re-probed with an anti- $\alpha$ -tubulin antibody (Sigma, Saint Louis, MI) as a loading control.

### Pharmacological inhibitors

NF $\kappa$ B inhibitor II JSH-23 (30  $\mu$ M; EMD, La Jolla, CA) was dissolved in Me<sub>2</sub>SO (cell culture grade; Sigma) and used to treat cells. Cisplatin (20  $\mu$ M; Sigma, Saint Louis, MO, USA) was dissolved in 0.9% NaCl.

### Enzyme-linked immunosorbent assay (ELISA)

The concentration of VEGF-C in the cell conditioned medium was determined by a commercially available ELISA Kit (Calbiochem/Oncogene, Cambridge, MA, USA). Briefly, the collected condition medium was added to a well coated with VEGF-C polyclonal antibody and then immunosorbent with biotinylated monoclonal antihuman VEGF-C antibody at room temperature for 2 h. The color development catalyzed by horseradish peroxidase was terminated with 2.5 M sulphuric acid and the absorption was measured at 450 nm. The protein concentration was calculated by comparing the relative absorbance of the samples with the standards.

### Luciferase assay

Cells ( $3 \times 10^4$ ) were seeded in triplicates in 48-well plates and allowed to settle for 24 h. 0.1  $\mu$ g of pNF- $\kappa$ B-luc plasmid, or the control-luciferase plasmid, plus 1 ng of pRL-TK renilla plasmid (Promega), were transfected into HCC cells using the Lipofectamine 2000 reagent (Invitrogen). 48 hours after transfection, luciferase and renilla activities were measured using the Dual Luciferase Reporter Assay Kit (Promega).

### Migration assay

HUVECs ( $2 \times 10^4$ ) were plated in the upper chamber of the BioCoat™ Invasion Chambers (BD, Bedford, MA) and incubated with the conditional medium collected from HCC cells infected with Vector, AGK or Scramble, AGK-RNAi at 37°C for 22 hours, followed by removal of cells inside the upper chamber with cotton swabs. Migratory cells on the lower membrane surface were fixed in 1% paraformaldehyde, stained with hematoxylin, and counted (Ten random 200  $\times$  fields per well). Cell counts are expressed as the mean number of cells per field of view. Three independent experiments were performed and the data are presented as mean  $\pm$  standard deviation (SD).

### HUVEC tube formation assay

HUVEC tube formation assay was performed as previously described [58]. Briefly, 200  $\mu$ l of pre-cooled Matrigel (Collaborative Biomedical Products) was transferred into each well of a 24-well plate and polymerized for 30 minutes at 37°C. HUVECs ( $2 \times 10^4$ ) in 200  $\mu$ l of conditioned medium were added to each well and incubated at 37°C, 5% CO<sub>2</sub> for 20 hours. The capillary tube structure was photographed under a 100  $\times$  bright-field microscope, and quantified by measuring the total length of the completed tubes. Each condition was assessed in triplicate.

### Electrophoretic mobility shift assay (EMSA)

EMSA was performed as previous study using the LightShift Chemiluminescent EMSA kit (Pierce Biotechnology) [58]. The following DNA probes containing specific binding sites were used: NF- $\kappa$ B sense, 5'-AGTTGAGGGGACTTTCCCAGGC-3'; NF- $\kappa$ B antisense, 5'-GCCTGGGAAAGTCCCCTCAAC-3'.

### Xenografted tumor mode

4–5 week old BALB/c-nu mice were purchased from the Center of Experimental Animal of Guangzhou University of Chinese Medicine (Guangzhou, China). All experimental procedures were approved by the Institutional Animal Care and Use Committee of Sun Yat-sen University. The BALB/c nude mice were subcutaneous injection of Huh7/ Vector, Huh7/AGK or Huh7/Scramble, Huh7/AGK-RNAi cells ( $5 \times 10^6$ ) in the dorsal flank. Xenograft tumors were examined once every three days. Tumor size was measured using a slide caliper and tumor volume was determined by the formula  $(L \times W^2)/2$  (L indicates the length-diameter and W the width-diameter of the tumor). 30 days after injection, tumors were excised, weighed, and paraffin embedded. Serial 4.0- $\mu$ m sections were cut and stained with haematoxylin and eosin according to standard protocols. The apoptotic index was



measured by assessing the percentage of TUNEL-positive cells. In the experiment testing the chemoresistant effect of AGK, the BALB/c nude mice (4–5 weeks of age, 18–20 g;  $n = 6/\text{group}$ ) were implanted subcutaneously with Huh7/vector and Huh7/AGK cells ( $5 \times 10^6$ , suspended in 100  $\mu\text{l}$  sterile PBS). After 6 days, animals were intraperitoneally injected with 100  $\mu\text{l}$  cisplatin (6mg/kg) every other day. On day 30, animals were euthanized, and tumors were excised, weighed and subjected to pathological examination.

### Statistical analysis

All statistical analyses were carried out using the SPSS13.0 statistical software package. The chi-square test was used to analyze the relationship between AGK expression and clinicopathological characteristics. Survival curves were plotted by the Kaplan–Meier method and compared using the log-rank test. Comparisons between groups for statistical significance were carried out with a 2-tailed paired Student's *t*-test. In all cases,  $P < 0.05$  was considered significant.

### ACKNOWLEDGEMENTS

This work was supported by the Ministry of Science and Technology of China grant (973 Program, No. 2012CB519003); The Guangdong Province Universities and Colleges Pearl River Scholar Funded Scheme (GDUPS, 2012), Natural Science Foundation of China (81472546, 81325013, 81225018, 81030048, 91229101, U1201121, 81272196, 81171892 and 81272198), the Science and Technology Department of Guangdong Province (S2011020002757 and S2012020010946), Ministry of Education of China (20100171110080, 20120171110055), the China Postdoctoral Science Foundation (2014M550448) and the Guangdong provincial Department of Science and Technology (2011A080300002).

### Authors' contributions

LS and JL designed and conceived the study. YC, CL and ZW carried out most of the experimental work. AL and XZ conducted the molecular cloning and animal experiments. JZ and GW conducted the immunohistochemistry analysis. JW conducted the luciferase assay experiments. ML, JL and LS supervised the project. YC, CL and LS wrote the manuscript. All authors read and approved the manuscript.

### Conflict of interest

The authors declared no conflict of interest.

### REFERENCES

1. Jemal A, Bray F, Center MM, Ferlay J, Ward E, Forman D. Global cancer statistics. *CA: a cancer journal for clinicians*. 2011; 61:69–90.
2. Muto J, Shirabe K, Sugimachi K, Maehara Y. Review of angiogenesis in hepatocellular carcinoma. *Hepatology research: the official journal of the Japan Society of Hepatology*. 2014.
3. Semela D, Dufour JF. Angiogenesis and hepatocellular carcinoma. *Journal of hepatology*. 2004; 41:864–880.
4. Finn RS, Zhu AX. Targeting angiogenesis in hepatocellular carcinoma: focus on VEGF and bevacizumab. *Expert review of anticancer therapy*. 2009; 9:503–509.
5. Raskopf E, Vogt A, Sauerbruch T, Schmitz V. siRNA targeting VEGF inhibits hepatocellular carcinoma growth and tumor angiogenesis in vivo. *Journal of hepatology*. 2008; 49:977–984.
6. Poon RT, Lau CP, Cheung ST, Yu WC, Fan ST. Quantitative correlation of serum levels and tumor expression of vascular endothelial growth factor in patients with hepatocellular carcinoma. *Cancer research*. 2003; 63:3121–3126.
7. Kerr SH, Kerr DJ. Novel treatments for hepatocellular cancer. *Cancer letters*. 2009; 286:114–120.
8. Bishayee A, Darvesh AS. Angiogenesis in hepatocellular carcinoma: a potential target for chemoprevention and therapy. *Current cancer drug targets*. 2012; 12:1095–1118.
9. Welker MW, Trojan J. Anti-angiogenesis in hepatocellular carcinoma treatment: current evidence and future perspectives. *World journal of gastroenterology : WJG*. 2011; 17:3075–3081.
10. Choi MJ, Jung KH, Kim D, Lee H, Zheng HM, Park BH, Hong SW, Kim MH, Hong S, Hong SS. Anti-cancer effects of a novel compound HS-113 on cell growth, apoptosis, and angiogenesis in human hepatocellular carcinoma cells. *Cancer letters*. 2011; 306:190–196.
11. Hao CY. Angiogenesis blockade as therapy for hepatocellular carcinoma: progress and challenges. *Journal of gastroenterology and hepatology*. 2011; 26:4–6.
12. Karin M. Nuclear factor-kappaB in cancer development and progression. *Nature*. 2006; 441:431–436.
13. Garner JM, Fan M, Yang CH, Du Z, Sims M, Davidoff AM, Pfeffer LM. Constitutive activation of signal transducer and activator of transcription 3 (STAT3) and nuclear factor kappaB signaling in glioblastoma cancer stem cells regulates the Notch pathway. *The Journal of biological chemistry*. 2013; 288:26167–26176.
14. Wu Z, Peng X, Li J, Zhang Y, Hu L. Constitutive activation of nuclear factor kappaB contributes to cystic fibrosis transmembrane conductance regulator expression and promotes human cervical cancer progression and poor prognosis. *International journal of gynecological cancer : official journal of the International Gynecological Cancer Society*. 2013; 23:906–915.

15. Yokoo H, Yasuda J, Nakanishi K, Chuma M, Kamiyama T, Todo S, Hirohashi S, Sakamoto M. Clinicopathological significance of nuclear factor-kappaB activation in hepatocellular carcinoma. *Hepatology research : the official journal of the Japan Society of Hepatology*. 2011; 41:240–249.
16. Santhekadur PK, Das SK, Gredler R, Chen D, Srivastava J, Robertson C, Baldwin AS Jr., Fisher PB, Sarkar D. Multi-function protein staphylococcal nuclease domain containing 1 (SND1) promotes tumor angiogenesis in human hepatocellular carcinoma through novel pathway that involves nuclear factor kappaB and miR-221. *The Journal of biological chemistry*. 2012; 287:13952–13958.
17. Dolcet X, Llobet D, Pallares J, Matias-Guiu X. NF-kB in development and progression of human cancer. *Virchows Archiv: an international journal of pathology*. 2005; 446:475–482.
18. Shishodia S, Aggarwal BB. Nuclear factor-kappaB activation mediates cellular transformation, proliferation, invasion angiogenesis and metastasis of cancer. *Cancer treatment and research*. 2004; 119:139–173.
19. Keats JJ, Fonseca R, Chesi M, Schop R, Baker A, Chng WJ, Van Wier S, Tiedemann R, Shi CX, Sebag M, Braggio E, Henry T, Zhu YX, Fogle H, Price-Troska T, Ahmann G. Promiscuous mutations activate the noncanonical NF-kappaB pathway in multiple myeloma. *Cancer cell*. 2007; 12:131–144.
20. Annunziata CM, Davis RE, Demchenko Y, Bellamy W, Gabrea A, Zhan F, Lenz G, Hanamura I, Wright G, Xiao W, Dave S, Hurt EM, Tan B, Zhao H, Stephens O, Santra M. Frequent engagement of the classical and alternative NF-kappaB pathways by diverse genetic abnormalities in multiple myeloma. *Cancer cell*. 2007; 12:115–130.
21. He G, Karin M. NF-kappaB and STAT3 - key players in liver inflammation and cancer. *Cell research*. 2011; 21:159–168.
22. Mills GB, Moolenaar WH. The emerging role of lysophosphatidic acid in cancer. *Nature reviews Cancer*. 2003; 3:582–591.
23. Nouh MA, Wu XX, Okazoe H, Tsunemori H, Haba R, Abou-Zeid AM, Saleem MD, Inui M, Sugimoto M, Aoki J, Kakehi Y. Expression of autotaxin and acylglycerol kinase in prostate cancer: association with cancer development and progression. *Cancer science*. 2009; 100:1631–1638.
24. Spiegel S, Milstien S. Critical role of acylglycerol kinase in epidermal growth factor-induced mitogenesis of prostate cancer cells. *Biochemical Society transactions*. 2005; 33:1362–1365.
25. Wang X, Lin C, Zhao X, Liu A, Zhu J, Li X, Song L. Acylglycerol kinase promotes cell proliferation and tumorigenicity in breast cancer via suppression of the FOXO1 transcription factor. *Molecular cancer*. 2014; 13:106.
26. Chen X, Ying Z, Lin X, Lin H, Wu J, Li M, Song L. Acylglycerol kinase augments JAK2/STAT3 signaling in esophageal squamous cells. *The Journal of clinical investigation*. 2013; 123:2576–2589.
27. Bektas M, Payne SG, Liu H, Goparaju S, Milstien S, Spiegel S. A novel acylglycerol kinase that produces lysophosphatidic acid modulates cross talk with EGFR in prostate cancer cells. *The Journal of cell biology*. 2005; 169:801–811.
28. Luedde T, Schwabe RF. NF-kappaB in the liver—linking injury, fibrosis and hepatocellular carcinoma. *Nature reviews Gastroenterology & hepatology*. 2011; 8:108–118.
29. Robinson SM, Mann DA. Role of nuclear factor kappaB in liver health and disease. *Clinical science*. 2010; 118:691–705.
30. Sun B, Karin M. NF-kappaB signaling, liver disease and hepatoprotective agents. *Oncogene*. 2008; 27:6228–6244.
31. Sugimachi K, Tanaka S, Terashi T, Taguchi K, Rikimaru T. The mechanisms of angiogenesis in hepatocellular carcinoma: angiogenic switch during tumor progression. *Surgery*. 2002; 131:S135–141.
32. Dupuy E, Hainaud P, Villemain A, Bodevin-Phedre E, Brouland JP, Briand P, Tobelem G. Tumoral angiogenesis and tissue factor expression during hepatocellular carcinoma progression in a transgenic mouse model. *Journal of hepatology*. 2003; 38:793–802.
33. Sugimachi K, Tanaka S, Taguchi K, Aishima S, Shimada M, Tsuneyoshi M. Angiopoietin switching regulates angiogenesis and progression of human hepatocellular carcinoma. *Journal of clinical pathology*. 2003; 56:854–860.
34. Mise M, Arii S, Higashitani H, Furutani M, Niwano M, Harada T, Ishigami S, Toda Y, Nakayama H, Fukumoto M, Fujita J, Imamura M. Clinical significance of vascular endothelial growth factor and basic fibroblast growth factor gene expression in liver tumor. *Hepatology*. 1996; 23:455–464.
35. Pang R, Poon RT. Angiogenesis and antiangiogenic therapy in hepatocellular carcinoma. *Cancer letters*. 2006; 242:151–167.
36. Park YN, Kim YB, Yang KM, Park C. Increased expression of vascular endothelial growth factor and angiogenesis in the early stage of multistep hepatocarcinogenesis. *Archives of pathology & laboratory medicine*. 2000; 124:1061–1065.
37. Yao DF, Wu XH, Zhu Y, Shi GS, Dong ZZ, Yao DB, Wu W, Qiu LW, Meng XY. Quantitative analysis of vascular endothelial growth factor, microvascular density and their clinicopathologic features in human hepatocellular carcinoma. *Hepatobiliary & pancreatic diseases international : HBPD INT*. 2005; 4:220–226.
38. Poon RT, Ho JW, Tong CS, Lau C, Ng IO, Fan ST. Prognostic significance of serum vascular endothelial growth factor and endostatin in patients with hepatocellular carcinoma. *The British journal of surgery*. 2004; 91:1354–1360.
39. Poon RT, Lau C, Yu WC, Fan ST, Wong J. High serum levels of vascular endothelial growth factor predict poor response to transarterial chemoembolization in hepatocellular carcinoma: a prospective study. *Oncology reports*. 2004; 11:1077–1084.
40. Shimada H, Takeda A, Nabeya Y, Okazumi SI, Matsubara H, Funami Y, Hayashi H, Gunji Y, Kobayashi S, Suzuki T, Ochiai T. Clinical significance of serum vascular

- endothelial growth factor in esophageal squamous cell carcinoma. *Cancer*. 2001; 92:663–669.
41. El-Assal ON, Yamanoi A, Soda Y, Yamaguchi M, Igarashi M, Yamamoto A, Nabika T, Nagasue N. Clinical significance of microvessel density and vascular endothelial growth factor expression in hepatocellular carcinoma and surrounding liver: possible involvement of vascular endothelial growth factor in the angiogenesis of cirrhotic liver. *Hepatology*. 1998; 27:1554–1562.
  42. Deli G, Jin CH, Mu R, Yang S, Liang Y, Chen D, Makuuchi M. Immunohistochemical assessment of angiogenesis in hepatocellular carcinoma and surrounding cirrhotic liver tissues. *World journal of gastroenterology* : WJG. 2005; 11:960–963.
  43. Medina J, Sanz-Cameno P, Garcia-Buey L, Martin-Vilchez S, Lopez-Cabrera M, Moreno-Otero R. Evidence of angiogenesis in primary biliary cirrhosis: an immunohistochemical descriptive study. *Journal of hepatology*. 2005; 42:124–131.
  44. Zhu AX. Molecularly targeted therapy for advanced hepatocellular carcinoma in 2012. current status and future perspectives. *Seminars in oncology*. 2012. 39:493–502.
  45. Huynh H. Molecularly targeted therapy in hepatocellular carcinoma. *Biochemical pharmacology*. 2010; 80:550–560.
  46. Daoudaki M, Fouzas I. Hepatocellular carcinoma. *Wien Med Wochenschr*. 2014.
  47. Aoki Y, Hirai K, Yamashita K, Noguchi H, Sakai T, Majima Y, Tanikawa K, Inoue H, Okano Y, Hitoshi T. [Chemotherapy with Cisplatin-Phosphatidyl-choline-Lipiodol (CPL) suspension in unresectable hepatocellular carcinoma] *Gan to kagaku ryoho Cancer & chemotherapy*. 1989; 16:3066–3069 .
  48. Ryu SH, Chung YH. How to overcome multidrug resistance in chemotherapy for advanced hepatocellular carcinoma. *Liver international : official journal of the International Association for the Study of the Liver*. 2010; 30:496–498.
  49. Chan SL, Yeo W. Development of systemic therapy for hepatocellular carcinoma at 13. updates and insights. *World journal of gastroenterology* : WJG. 14. 20:3135–3145.
  50. Qiao L, Zhang H, Yu J, Francisco R, Dent P, Ebert MP, Rocken C, Farrell G. Constitutive activation of NF-kappaB in human hepatocellular carcinoma: evidence of a cytoprotective role. *Human gene therapy*. 2006; 17:280–290.
  51. Brose MS, Volpe P, Feldman M, Kumar M, Rishi I, Gerrero R, Einhorn E, Herlyn M, Minna J, Nicholson A, Roth JA, Albelda SM, Davies H, Cox C, Brignell G, Stephens P. BRAF and RAS mutations in human lung cancer and melanoma. *Cancer research*. 2002; 62:6997–7000.
  52. Corcoran RB, Dias-Santagata D, Bergethon K, Iafrate AJ, Settleman J, Engelman JA. BRAF gene amplification can promote acquired resistance to MEK inhibitors in cancer cells harboring the BRAF V600E mutation. *Science signaling*. 2010; 3:ra84.
  53. Wang J, Huang Q, Chen M. The role of NF-kappaB in hepatocellular carcinoma cell. *Chinese medical journal*. 2003; 116:747–752.
  54. Wu JM, Sheng H, Saxena R, Skill NJ, Bhat-Nakshatri P, Yu M, Nakshatri H, Maluccio MA. NF-kappaB inhibition in human hepatocellular carcinoma and its potential as adjunct to sorafenib based therapy. *Cancer letters*. 2009; 278:145–155.
  55. Muriel P. NF-kappaB in liver diseases: a target for drug therapy. *Journal of applied toxicology* : JAT. 2009; 29:91–100.
  56. Orłowski RZ AS Jr. NF-kappaB as a therapeutic target in cancer. *Trends in molecular medicine*. 2002; 8:385–389.
  57. Cui YM, Jiang D, Zhang SH, Wu P, Ye YP, Chen CM, Tang N, Liang L, Li TT, Qi L, Wang SY, Jiao HL, Lin J, Ding YQ, Liao WT. FOXO2 promotes colorectal cancer proliferation through inhibition of FOXO3a and activation of MAPK and AKT signaling pathways. *Cancer letters*. 2014; 353:87–94.
  58. Lin C, Song L, Gong H, Liu A, Lin X, Wu J, Li M, Li J. Nkx2-8 downregulation promotes angiogenesis and activates NF-kappaB in esophageal cancer. *Cancer research*. 2013; 73:3638–3648.
